# Supplementary material for: Physical confinement in alginate cryogels determines macrophage polarization to a M2 phenotype by regulating a STAT-related mRNA transcription pathway
Source: Royal Society of Chemistry journal article supplement (doi:10.1039/d1bm01719e), 2022-01-01
Supplement: d1bm01719e1.pdf [file d1bm01719e1.pdf]

## Supporting Information

# Physical Confinement in Alginate Cryogels Determines Macrophage Polarization to a M2 phenotype by Regulating a STAT-Related mRNA Transcription Pathway

Zhen-Zhen Liu<sup>1,#</sup>, Nian-Yuan Xu<sup>1,#</sup>, Mei-Ling Wang<sup>1</sup>, Rui-Zhi Tang<sup>2,\*</sup>, Xi-Qiu Liu<sup>1,\*</sup>

<sup>1</sup> School of Pharmacy, Tongji Medical College, Huazhong University of Science and Technology, Wuhan, 430030, P.R. China

<sup>2</sup> Department of Medical Laboratory, The Central Hospital of Wuhan, Tongji Medical College, Huazhong University of Science and Technology, Wuhan, 430030, P.R. China

# Equal contribution.

\* Corresponding author: Dr. Rui-Zhi Tang ([ruizhitang@163.com](mailto:ruizhitang@163.com))

Prof. Xi-Qiu Liu ([xiquiliu@hust.edu.cn](mailto:xiquiliu@hust.edu.cn))

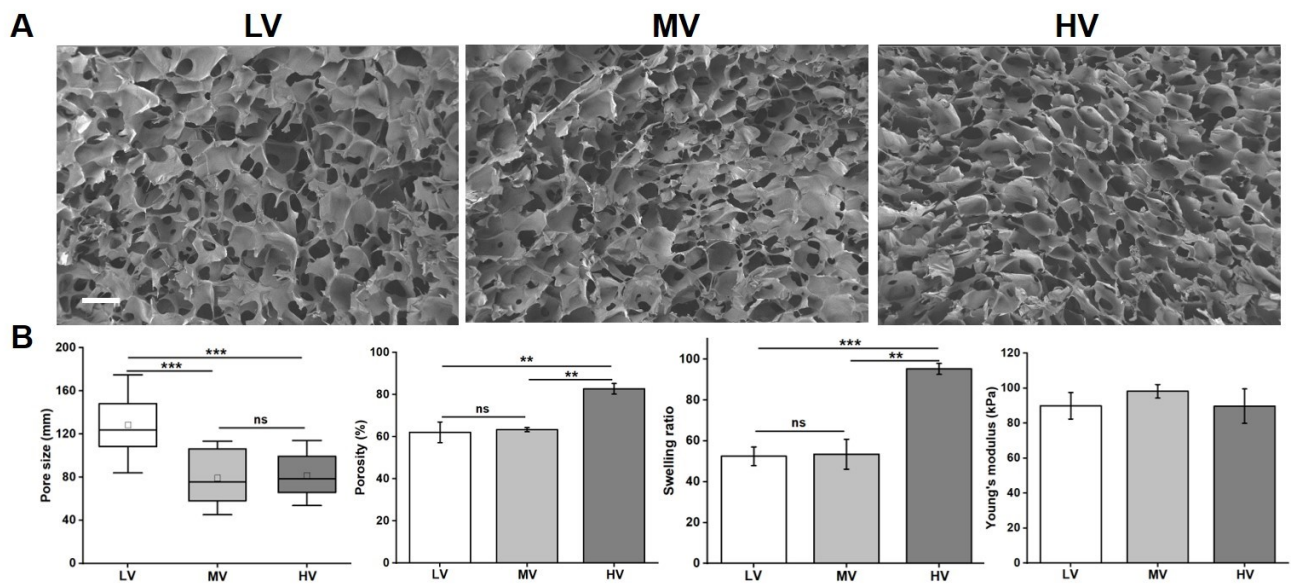

**Figure S1.** Characterization of cryogels after macrophage incubation. (A) Representative SEM images. (B) Pore size, interconnected porosity, swelling ratio and Young's modulus of three cryogels. Scale bar: 200  $\mu\text{m}$ . \*\*,  $p < 0.01$ ; \*\*\*,  $p < 0.001$ ; ns, not significant.

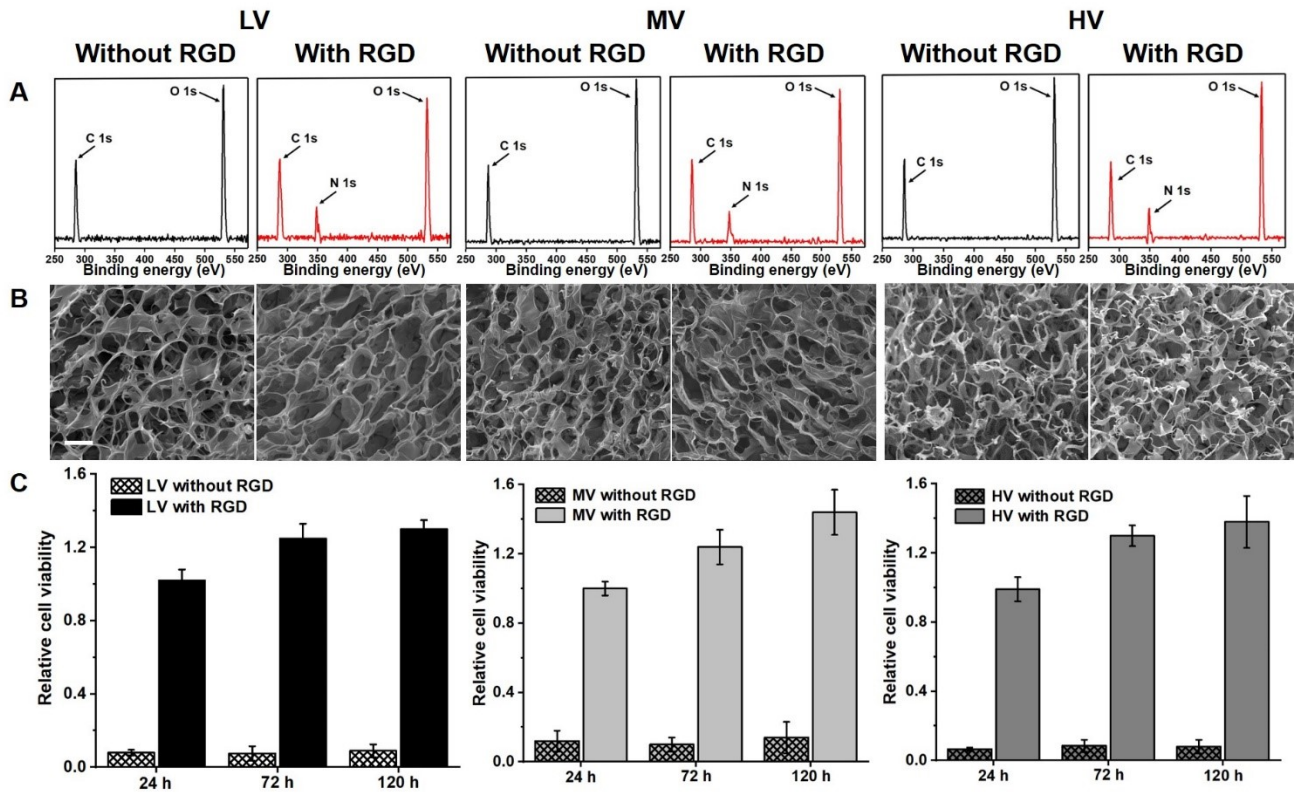

**Figure S2.** Characterization of cryogels before and after RGD modification. (A) XPS wide scans. (B) SEM images. Scale bar: 100  $\mu\text{m}$ . (C) Relative cell viability.
